# Supplementary material for: Vascular smooth muscle cell proliferation depends on caveolin-1-regulated polyamine uptake
Source: PubMed Central journal article supplement (PMC4240025; doi:10.1042/bsr20140140), 2014-11-21

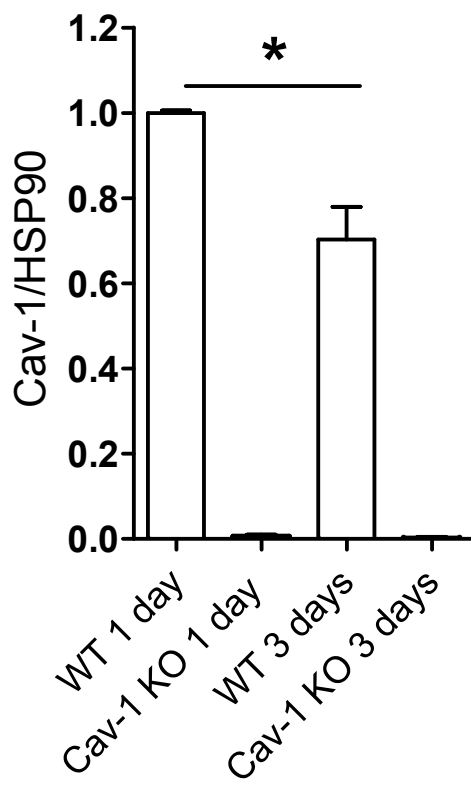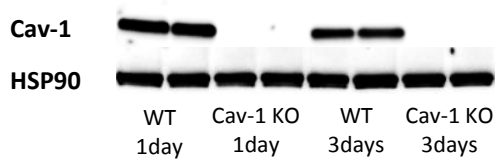

**A**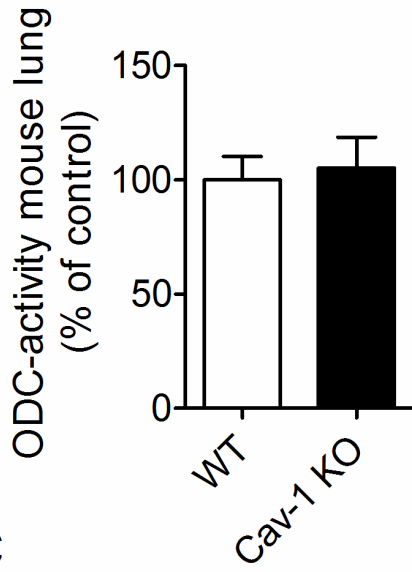**B**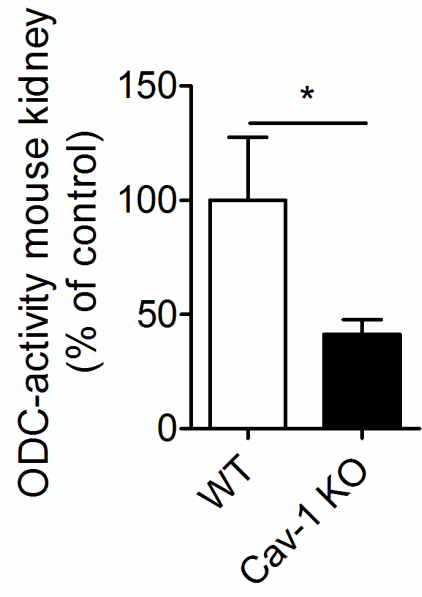**C**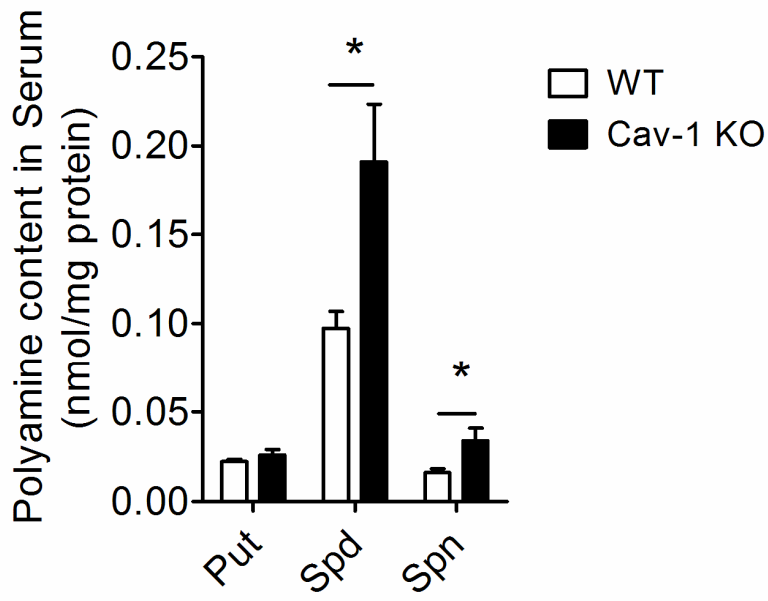

Supplement: bsr034e153ntsadd.pdf [file bsr034e153ntsadd.pdf]
